# Supplementary material for: Corrosion behaviour of mild steel in 1-alkyl-3-methylimidazolium tricyanomethanide ionic liquids for CO2 capture applications
Source: Royal Society of Chemistry journal article supplement (doi:10.1039/c3ra45872e), 2013-12-09
Supplement: c3ra45872e.pdf [file c3ra45872e.pdf]

ESI

Corrosion behaviour of mild steel in 1-alkyl-3-methylimidazolium tricyanomethanide ionic liquids for CO<sub>2</sub> capture applications

I. S. Molchan\*, G. E. Thompson, R. Lindsay P. Skeldon, V. Likodimos\*, G. Em. Romanos, P. Falaras, G. Adamova and B. Iliev

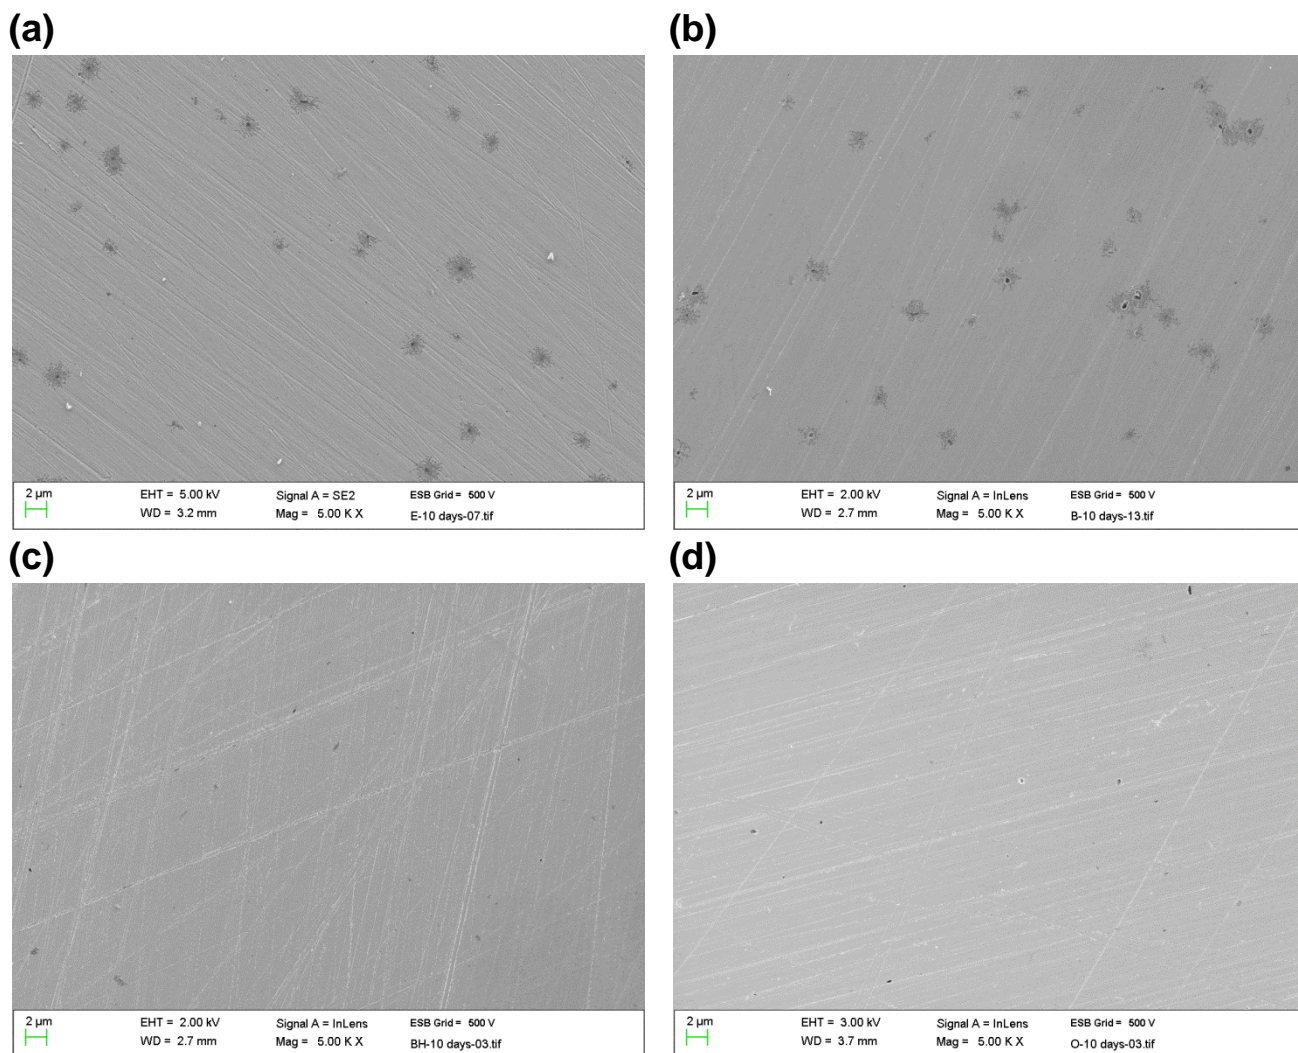

**Fig. S1** Scanning electron micrographs of the surface of mild steel after immersion in (a) [C<sub>2</sub>mim]TCM, (b) [C<sub>4</sub>mim]TCM, (c) [C<sub>6</sub>mim]TCM and (d) [C<sub>8</sub>mim]TCM at 80 °C for 10 days.

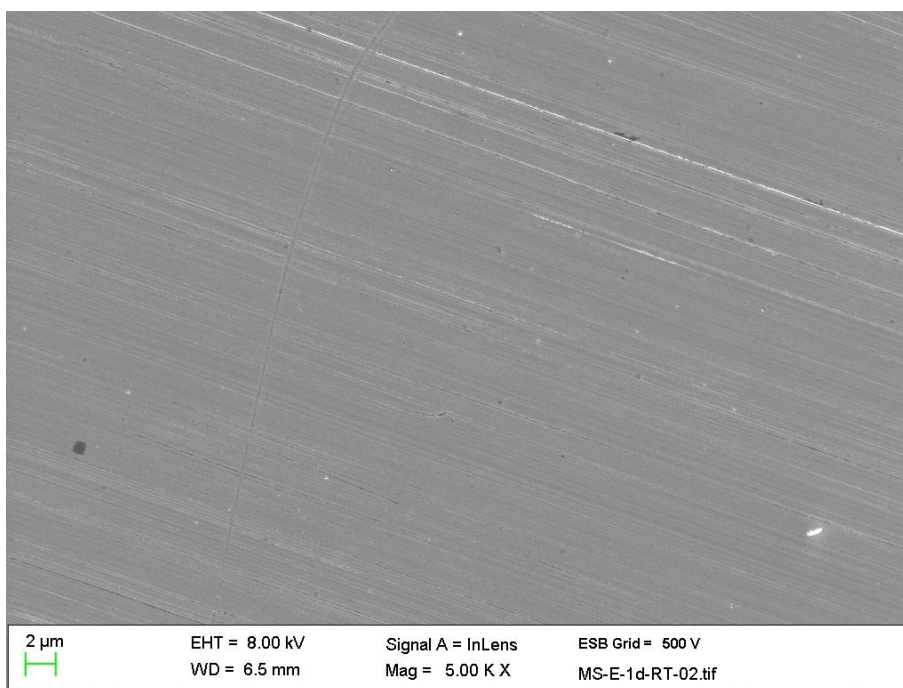

**Fig. S2** Scanning electron micrograph of the surface of mild steel after immersion in [C<sub>2</sub>mim]TCM at room temperature for 1 day.

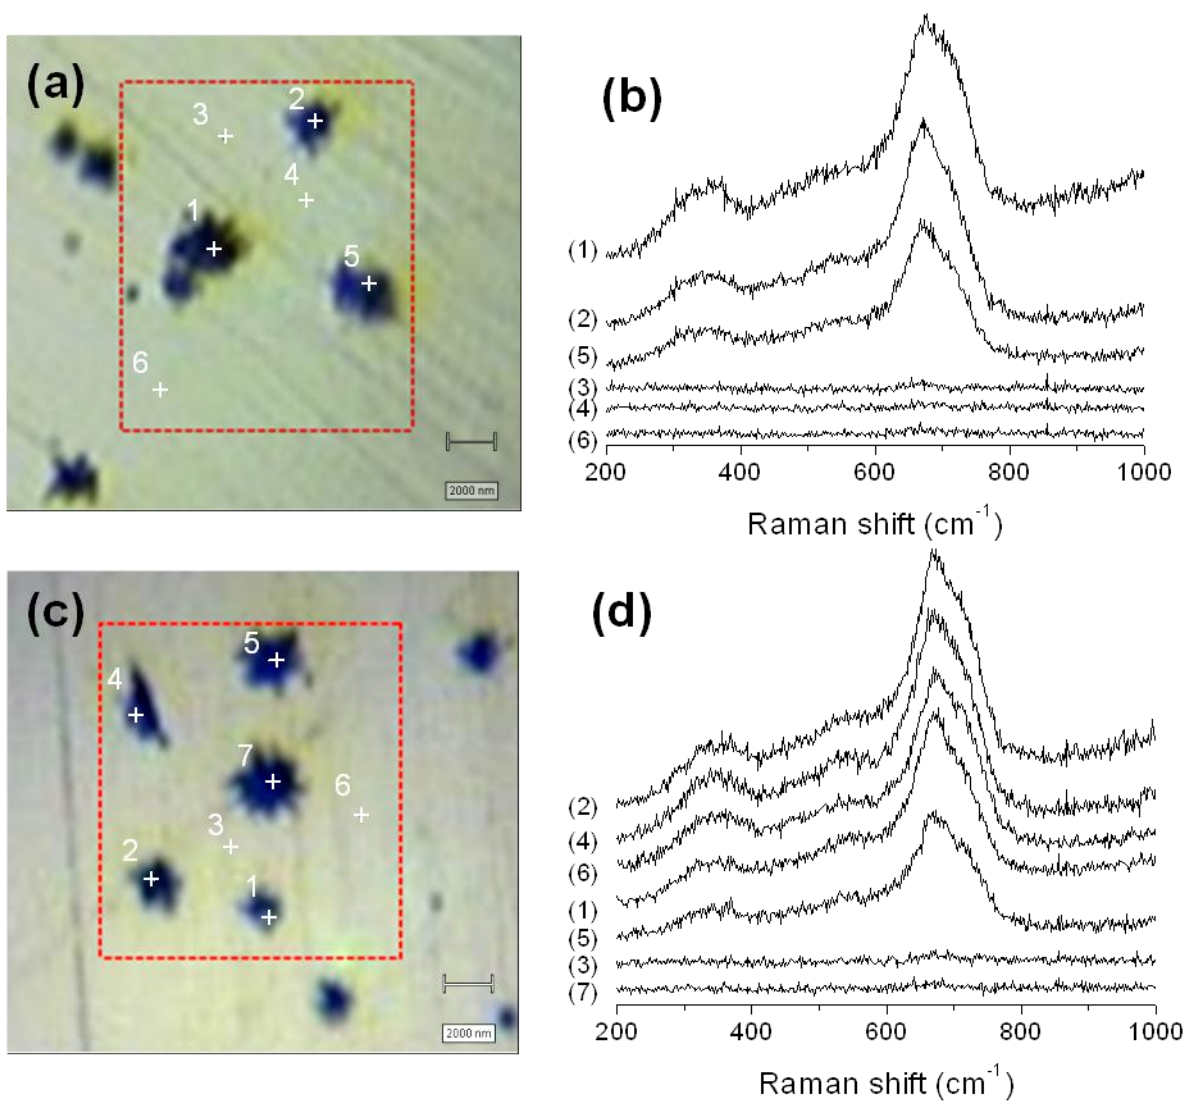

**Fig. S3** (a, c) Optical micrographs and (b, d) related Raman spectra at different points on the surface of the MS after immersion in [C<sub>4</sub>mim]TCM at 80 °C for (a, b) 1 and (c, d) 10 days. Excitation wavelength is 514.5 nm.

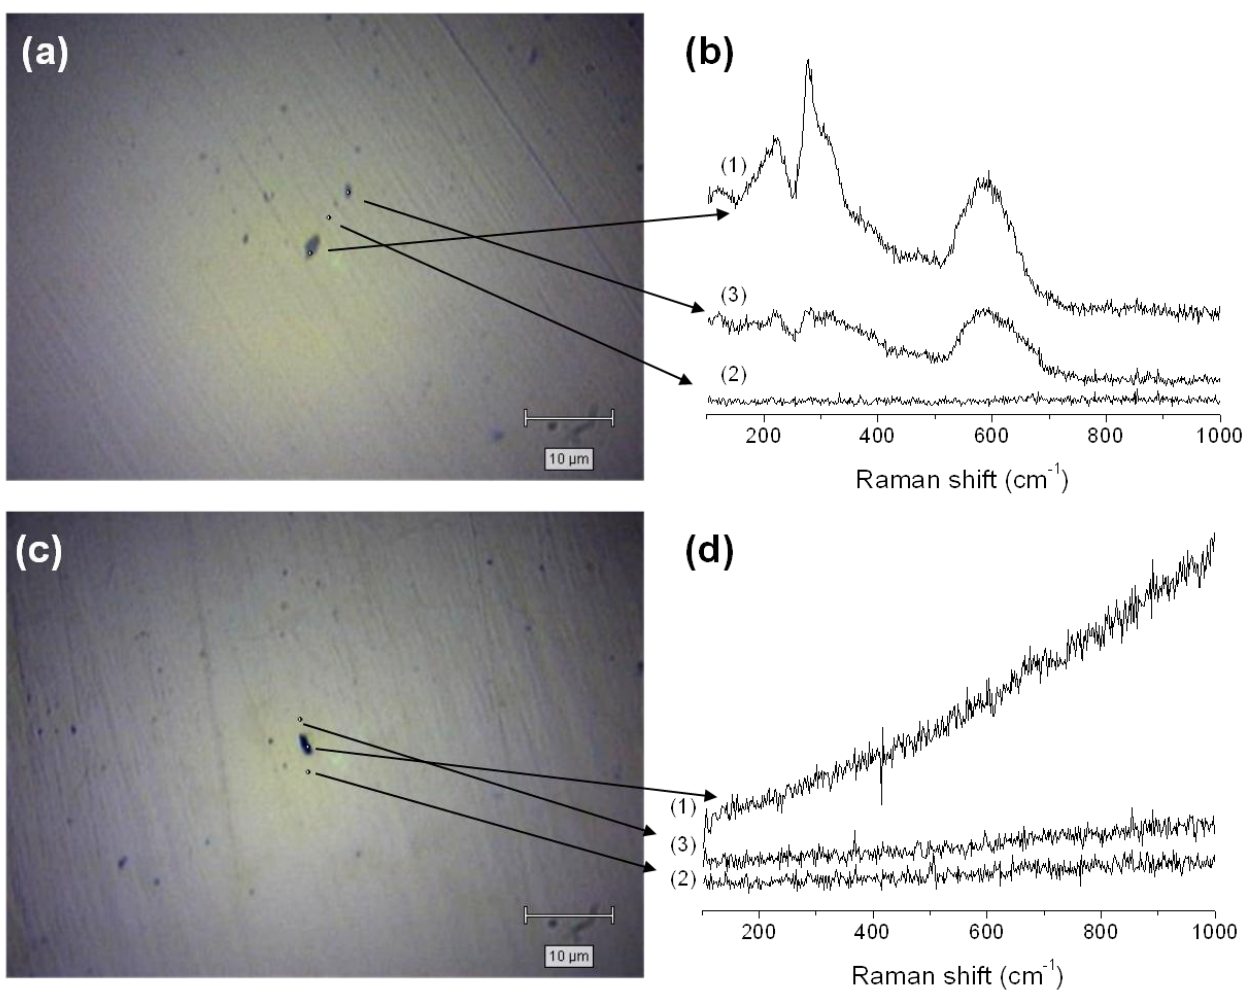

**Fig. S4** (a, c) Optical micrographs and (b, d) related Raman spectra at different points on the surface of MS after immersion in [C<sub>8</sub>mim]TCM at 70 °C for 2h: (a, b) as-received and (c, d) with 53900 ppm water. Excitation wavelength is 514.5 nm.
